# Supplementary material for: African Program for Onchocerciasis Control 1995–2010: Impact of Annual Ivermectin Mass Treatment on Off-Target Infectious Diseases
Source: PLoS Negl Trop Dis. 2015 Sep 24;9(9):e0004051. doi: 10.1371/journal.pntd.0004051 (PMC4581698; doi:10.1371/journal.pntd.0004051)
Supplement: S1 File — Excel spreadsheet. (XLS) [file pntd.0004051.s001.xls]

## Sheet: APOC off-target impact analysis
Yellow	Input for calculations
Orange	Calculations, do NOT modify; refer to the formula to see where the original input data are
Green	Scale parameters for sensitivity analysis (value is multiplied with corresponding parameter value in main analysis)
	N.B. Set all scale parameters back to one before interpreting or copying tables in the other worksheets.
Formula (see manuscript for details). Index i goes up to 16 to account for Sudan splitting up; in the calculations, we still consider 15 countries, which does not matter for the estimated total health impact.
Example calculation for ascariasis in Cameroon, 2010	Parameter	Value	Interpretation
	beta_x	0.5	Ivermectin efficacy against disease x
	T_iy	5300025	Number of treatments dispensed in country i in year y
	h_ix	1	Heterogeneity index for disease x in country i
	pMc_x + pMw_x	0.1	Proportion of burden in population not eligible for ivermectin in country x
	pc + pw	0.2	Proportion of population not eligible for ivermectin
	Mcap_ixy	80.15	Burden per 100,000 capita due to disease x in country i in year y
	Ma_iyx	2389.48	Burden (DALYs) due to disease x averted in country i in year y by APOC activities
Averted burden related to off-target NTDs between 1995 and 2010
Assuming that the burden per capita in 1995, 2000, 2005, and 2010 from GBD 2010 is representative for the periode 1995-2010									Heterogeneity index
Country	Ascariasis	Trichuriasis	Hookworm	LF	Strongyloides	EPSD	Total		Scale parameter (affects all but LF)
Angola	184.628	61.9026	207.113	86.2749	162.178	235.791	937.887		1
Burundi	396.045	128.663	1304.3	726.792	838.594	1199.87	4594.26		1
Cameroon	23642.4	6134.61	5653.99	7249.71	8524.54	8046.44	59251.7		1
CAR	535.879	172.301	4252.88	349.858	2556.12	2988.82	10855.9		1	(h is already set to 1.5 in main analysis)
Chad	88.9196	0.369511	3177	2087.48	1831.3	8638.65	15823.7		1	(h is already set to 1.5 in main analysis)
Congo	1510.1	807.593	631.565	533.47	772.929	835.889	5091.55		1
RDC	18062	5488.28	11914.1	1563.54	10994.8	13959.5	61982.2		1
Eq. Guinea	140.736	54.8535	33.4308	36.5154	53.8748	13.2256	332.636		1
Ethiopia	2626.76	1748.46	2503.39	120.35	2208.32	7954.24	17161.5		1
Liberia	1070.58	526.657	2990.46	3710.43	1992.79	2864.59	13155.5		1
Malawi	261.335	13.7828	698.225	2555.18	447.896	5257.59	9234.01		1
Nigeria	112035	1180.24	20460.6	45261.4	31819	49115	259871		1	(h is already set to 1.5 in main analysis)
Sudan	63.982	6.6076	942.653	1910.82	551.208	5515.9	8991.16		1
Uganda	645.106	155.642	3326.29	3425.77	2043.09	4165.47	13761.4		1
Tanzania	210.112	453.75	2888.08	1240.5	1768.35	4907.01	11467.8		1
Total	161474	16933.7	60984.1	70858	66564.9	115698	492512
Crude total (ignoring variation between countries)	103962	20020.3	63972.7	56406	58597.1	134276	437234
Beta-coefficient (effectiveness of mass treatment with ivermectin for each non-target disease)
Scale parameter	1	1	1	1	1	1
Morbidity (DALYs x 1,000)
Scale parameter	1	1	1	1	1	1
Sensitivity analysis same results can be achieved by manually varying the values in the light-green boxes around the table above)
Variable or assumption	LOW	HIGH
Parameter βx for ascariasis (±20%)	460218	524807
Parameter βx for trichuriasis (±20%)	489126	495899
Parameter βx for hookworm (±20%)	480316	504709
Parameter βx for LF (±20%)	478341	506684
Parameter βx for strongyloidiasis (±20%)	479199	505825
Parameter βx for EPSDs (±20%)	469373	515652
Assumed proportion of strongyloidiasis burden (1/5): halfed or doubled	459230	559077
hix (±20%) in countries where clustering was assumed	435202	549823
No clustering (hix =1 for all countries) vs 100% clustering (hix =1.5 for all countries)	412895	583914
All βx Parameters (±20%)	394010	591015
Additional burden averted related to off-target NTDs between 2000 and 2010, if albendazol had been added to community-directed treatment with ivermectin
Assuming that the burden per capita in 2000, 2005, and 2010 from GBD 2010 is representative for the periode 2000-2010
Country	Ascariasis	Trichuriasis	Hookworm	LF	Strongyloides	EPSD	Total
Angola	147.702	49.5221	414.225	172.55	0	0	784
Burundi	316.836	102.93	2608.6	1453.58	0	0	4481.94
Cameroon	18572.6	4818.03	11104.7	14287.5	0	0	48782.9
CAR	362.398	126.125	7785.05	640.267	0	0	8913.84
Chad	65.6595	0.271762	5840.82	3837.81	0	0	9744.57
Congo	1208.08	646.074	1263.13	1066.94	0	0	4184.23
RDC	14449.6	4390.62	23828.1	3127.07	0	0	45795.5
Eq. Guinea	112.04	43.6718	66.5352	72.6816	0	0	294.929
Ethiopia	2101.41	1398.77	5006.77	240.7	0	0	8747.65
Liberia	846.24	416.061	5906.23	7330.37	0	0	14498.9
Malawi	198.39	10.4913	1327.44	4906.51	0	0	6442.84
Nigeria	84221.1	887.593	38449.1	85022.5	0	0	208580
Sudan	48.8065	5.05627	1803.41	3662.84	0	0	5520.1
Uganda	483.997	116.676	6230.15	6452.18	0	0	13283
Tanzania	163.611	352.578	5610.47	2407.5	0	0	8534.15
Total	123299	13364.5	117245	134681	0	0	388589
Crude total (ignoring variation between countries)	79666.9	15345.8	122595	108174	0	0	325781
Heterogeneity index
Country	Ascariasis	Trichuriasis	Hookworm	LF	Strongyloides	EPSDs
Angola	1	1	1	1	1	1
Burundi	1	1	1	1	1	1
Cameroon	1	1	1	1	1	1
CAR	1.5	1.5	1.5	1	1.5	1.5
Chad	1.5	1.5	1.5	1	1.5	1.5
Congo	1	1	1	1	1	1
RDC	1	1	1	1	1	1
Eq. Guinea	1	1	1	1	1	1
Ethiopia	1	1	1	1	1	1
Liberia	1	1	1	1	1	1
Malawi	1	1	1	1	1	1
Nigeria	1.5	1.5	1.5	1	1.5	1.5
Sudan	1	1	1	1	1	1
Uganda	1	1	1	1	1	1
Tanzania	1	1	1	1	1	1
Average	1.16913	1.16913	1.16913	1	1.16913	1.16913
Source: visual comparison of REMO and worm maps
Beta-coefficient (effectiveness of mass treatment with ivermectin for each non-target disease)
Country	Ascariasis	Trichuriasis	Hookworm	LF	Strongyloidiasis	EPSDs
All countries	0.5	0.5	0.2	0.1	0.5	0.5
Beta-coefficient (effectiveness of mass treatment with albendazol+ivermectin, in addition to ivermectin alone)
Country	Ascariasis	Trichuriasis	Hookworm	LF	Strongyloidiasis	EPSDs
All countries	0.4	0.4	0.4	0.2	0	0
Proportion of burden of disease in children under five and/or pregnant women
Country	Ascariasis	Trichuriasis	Hookworm	LF	Strongyloides	EPSDs
All countries	0.1	0.1	0.3	0.2	0.2	0.2
Proportion of population consisting of children and pregnant women
All countries	0.2
Burden of off-target NTDs in treated individuals between 1995 and 2010									Burden of off-target NTDs in treated individuals between 2000 and 2010
Assuming that the burden per capita in 1995, 2000, 2005, and 2010 from GBD 2010 is representative for the periode 1995-2010									Assuming that the burden per capita in 2000, 2005, and 2010 from GBD 2010 is representative for the periode 1995-2010
Country	Ascariasis	Trichuriasis	Hookworm	LF	Strongyloides	EPSD	Total		Country	Ascariasis	Trichuriasis	Hookworm	LF	Strongyloides	EPSD	Total
Angola	369.256	123.805	1035.56	862.749	324.355	471.582	3187.31		Angola	369.256	123.805	1035.56	862.749	324.355	471.582	3187.31
Burundi	792.089	257.325	6521.49	7267.92	1677.19	2399.73	18915.7		Burundi	792.089	257.325	6521.49	7267.92	1677.19	2399.73	18915.7
Cameroon	47284.8	12269.2	28270	72497.1	17049.1	16092.9	193463		Cameroon	46431.5	12045.1	27761.7	71437.7	16741.4	15815.6	190233
CAR	1071.76	344.603	21264.4	3498.58	5112.23	5977.64	37269.2		CAR	905.995	315.314	19462.6	3201.34	4665.72	5351.71	33902.7
Chad	177.839	0.739022	15885	20874.8	3662.61	17277.3	57878.3		Chad	164.149	0.679404	14602.1	19189.1	3366.92	15980.1	53303
Congo	3020.21	1615.19	3157.83	5334.7	1545.86	1671.78	16345.6		Congo	3020.21	1615.19	3157.83	5334.7	1545.86	1671.78	16345.6
RDC	36124.1	10976.6	59570.4	15635.4	21989.5	27919.1	172215		RDC	36124.1	10976.6	59570.4	15635.4	21989.5	27919.1	172215
Eq. Guinea	281.472	109.707	167.154	365.154	107.75	26.4512	1057.69		Eq. Guinea	280.1	109.179	166.338	363.408	107.225	26.2387	1052.49
Ethiopia	5253.52	3496.92	12516.9	1203.5	4416.65	15908.5	42796		Ethiopia	5253.52	3496.92	12516.9	1203.5	4416.65	15908.5	42796
Liberia	2141.16	1053.31	14952.3	37104.3	3985.57	5729.17	64965.8		Liberia	2115.6	1040.15	14765.6	36651.8	3936.01	5663.68	64172.8
Malawi	522.67	27.5656	3491.13	25551.8	895.791	10515.2	41004.1		Malawi	495.976	26.2281	3318.61	24532.6	851.376	10079.1	39303.9
Nigeria	224070	2360.48	102303	452614	63637.9	98230.1	943215		Nigeria	210553	2218.98	96122.8	425113	59797	91168.2	884972
Sudan	127.964	13.2152	4713.27	19108.2	1102.42	11031.8	36096.8		Sudan	122.016	12.6407	4508.51	18314.2	1054.46	10561.2	34573
Uganda	1290.21	311.284	16631.4	34257.7	4086.18	8330.94	64907.8		Uganda	1209.99	291.691	15575.4	32260.9	3827.05	7615.26	60780.3
Tanzania	420.224	907.5	14440.4	12405	3536.71	9814.02	41523.8		Tanzania	409.027	881.446	14026.2	12037.5	3435.4	9545.24	40334.8
Total	322947	33867.4	304920	708580	133130	231396	1.73484e+06		Total	308246	33411.2	293112	673405	127736	220177	1.65609e+06
Crude total (ignoring variation between countries)	207923	40040.7	319863	564060	117194	268553	1.51764e+06		Crude total (ignoring variation between countries)	199167	38364.4	306487	540870	112282	256387	1.45356e+06
Number of people treated = sum of number of treated people in each community (or project) in each country
Country	1995	1996	1997	1998	1999	2000	2001	2002	2003	2004	2005	2006	2007	2008	2009	2010
Angola											48286	69923	278093	282913	423391	711276
Burundi											164794	756833	860416	899564	1044371	1146033
Cameroon					529967	727930	1018100	1551620	2398120	3180769	3613842	4148276	4427481	4647473	4809180	5300025
CAR					934158	1076292	778989	714365	901423	913491	966364	763715	724791	870516	1088053	1264508
Chad				523117	591251	565819	999546	992542	993698	1032270	1065249	1203116	1389921	1421448	1513713	1542377
Congo							228220	195950	353281	383302	406031	416963	449171	478692	617167	651922
RDC							606420	1630344	4117035	5051770	4876791	8310318	9343606	9534666	17704257	20290244
Eq. Guinea					1236	7882	10797	10874		48551			50064	9294	56902	57735
Ethiopia							233309	516217	1023002	2960696	2531967	3665682	4135538	4315374	4613362	4809869
Liberia					177523	497662	900000	900000		216550	678178	1516586	2442161	3586007	1288496	2003343
Malawi			81399	185947	228014	293320	310056	473506	477103	1095530	1288264	1489491	1546433	1597659	1638355	1666048
Nigeria				2704039	12268844	15137352	16562658	18194229	19066359	19426514	20753411	21721592	23464448	23599875	26378374	29116332
South Sudan				51965	170235	24916	437666	138641			499585	936375	1299538	2029828	3011429	2981506
Sudan				160985	261094	398908	352269	357329	248180	372645	268526	91959	199599	57103	350083	329702
Uganda					1226494	1402018	1543926	1632987	1833494	1868351	1946983	2029957	2169926	2203148	2328352	2031079
Tanzania				97411	301709	283823	645232	730931	1051734	1271453	1252793	1553416	1684661	1554102	1616757	1901542
Total	0	0	81399	3723464	16690525	20415922	24627188	28039535	32463429	37821892	40361064	48674202	54465847	57087662	68482242	75803541
Source: "Treatment and Training by project - 12Oct2011_LC20111019.xls"
Disease burden of ASCARIASIS (DALYs per 100,000)																							Crude burden in ivermectin treated individuals (DALYs)
Country	1990	1991	1992	1993	1994	1995	1996	1997	1998	1999	2000	2001	2002	2003	2004	2005	2006	2007	2008	2009	2010		1995 - 2010	2000 - 2010
Angola	17.5	17.504	17.508	17.512	17.516	17.52	17.5717	17.6235	17.6755	17.7277	17.78	17.7439	17.7078	17.6718	17.6359	17.6	17.732	17.865	17.999	18.134	18.27		328.228	328.228
Burundi	21.74	21.4882	21.2394	20.9934	20.7503	20.51	20.3268	20.1451	19.9652	19.7868	19.61	19.592	19.574	19.556	19.538	19.52	17.6476	15.9549	14.4245	13.0409	11.79		704.079	704.079
Cameroon	146.14	145.73	145.321	144.913	144.506	144.1	143.851	143.603	143.355	143.107	142.86	142.68	142.499	142.319	142.14	141.96	126.623	112.943	100.742	89.8578	80.15		42030.9	41272.5
CAR	11.06	10.9952	10.9309	10.8669	10.8033	10.74	10.6834	10.6271	10.5711	10.5154	10.46	6.87175	4.51443	2.96578	1.94838	1.28	1.94652	2.9601	4.50147	6.84546	10.41		635.116	536.886
Chad	0.71	0.707989	0.705983	0.703983	0.701989	0.7	0.707823	0.715734	0.723733	0.731821	0.74	0.735956	0.731934	0.727934	0.723956	0.72	0.742543	0.765793	0.78977	0.814498	0.84		105.386	97.2733
Congo	62.89	62.9399	62.9899	63.0399	63.0899	63.14	63.2833	63.427	63.571	63.7153	63.86	63.9537	64.0476	64.1416	64.2357	64.33	64.302	64.274	64.246	64.218	64.19		2684.63	2684.63
RDC	38.24	38.1334	38.0271	37.9211	37.8154	37.71	37.7718	37.8337	37.8957	37.9578	38.02	38.0758	38.1318	38.1878	38.2438	38.3	38.6977	39.0994	39.5054	39.9156	40.33		32110.3	32110.3
Eq. Guinea	95.67	95.7379	95.8059	95.8739	95.9419	96.01	96.6747	97.3441	98.018	98.6967	99.38	99.352	99.324	99.296	99.268	99.24	99.0452	98.8509	98.6569	98.4632	98.27		250.198	248.978
Ethiopia	16.86	16.7526	16.646	16.54	16.4347	16.33	16.322	16.314	16.306	16.298	16.29	16.3318	16.3737	16.4157	16.4578	16.5	16.3803	16.2614	16.1434	16.0263	15.91		4669.8	4669.8
Liberia	14.49	14.2694	14.0521	13.8382	13.6275	13.42	13.2623	13.1065	12.9526	12.8004	12.65	12.662	12.674	12.686	12.698	12.71	13.0059	13.3087	13.6185	13.9356	14.26		1903.26	1880.53
Malawi	4.8	4.76345	4.72717	4.69118	4.65545	4.62	4.67087	4.7223	4.77429	4.82686	4.88	4.73572	4.5957	4.45982	4.32796	4.2	3.90013	3.62167	3.36309	3.12297	2.9		464.595	440.868
Nigeria	54.47	54.438	54.4059	54.3739	54.342	54.31	54.0963	53.8835	53.6715	53.4603	53.25	53.1133	52.977	52.841	52.7053	52.57	53.0047	53.4431	53.8851	54.3307	54.78		132782	124772
Sudan	0.83	0.839767	0.84965	0.859648	0.869765	0.88	0.863384	0.847082	0.831088	0.815396	0.8	0.795959	0.791939	0.787939	0.78396	0.78	0.769733	0.759602	0.749603	0.739737	0.73		113.746	108.459
Uganda	5.72	5.718	5.716	5.714	5.712	5.71	5.73577	5.76165	5.78765	5.81377	5.84	5.85986	5.8798	5.8998	5.91986	5.94	5.35587	4.82918	4.35428	3.92609	3.54		1146.85	1075.55
Tanzania	2.72	2.70176	2.68364	2.66564	2.64776	2.63	2.59297	2.55647	2.52047	2.48499	2.45	2.46968	2.48952	2.50952	2.52968	2.55	2.62541	2.70304	2.78297	2.86527	2.95		373.532	363.58
Average over all countries (weighted by population)						32.9005	32.8194	32.7145	32.58	32.4592	32.3414	32.2281	32.1263	32.0321	31.9378	31.8354	31.2851	30.8046	30.3926	30.0571	29.8288		158084	151426
Source: GBD, 2010.
Disease burden of TRICHURIASIS (DALYs per 100,000)																							Crude burden in ivermectin treated individuals (DALYs)
Country	1990	1991	1992	1993	1994	1995	1991	1992	1993	1994	2000	1991	1992	1993	1994	2005	1991	1992	1993	1994	2010		1995 - 2010	2000 - 2010
Angola	6.02	6.02	6.02	6.02	6.02	6.02	6.022	6.024	6.026	6.028	6.03	6.03	6.03	6.03	6.03	6.03	6.03997	6.04995	6.05995	6.06997	6.08		110.049	110.049
Burundi	6.18	6.182	6.184	6.186	6.188	6.19	6.192	6.194	6.196	6.198	6.2	6.202	6.204	6.206	6.208	6.21	5.6554	5.15033	4.69036	4.27148	3.89		228.733	228.733
Cameroon	37.8	37.778	37.756	37.734	37.712	37.69	37.666	37.642	37.618	37.594	37.57	37.548	37.526	37.504	37.482	37.46	33.0745	29.2024	25.7837	22.7651	20.1		10906	10706.7
CAR	1.85	1.85	1.85	1.85	1.85	1.85	1.852	1.85399	1.85599	1.858	1.86	1.86	1.86	1.86	1.86	1.86	1.858	1.85599	1.85399	1.852	1.85		204.209	186.852
Chad	0.0031	0.0031	0.0031	0.0031	0.0031	0.0031	0.00311975	0.00313962	0.00315962	0.00317975	0.0032	0.0032	0.0032	0.0032	0.0032	0.0032	0.00317975	0.00315962	0.00313962	0.00311975	0.0031		0.437939	0.40261
Congo	34.63	34.606	34.582	34.558	34.534	34.51	34.486	34.4619	34.4379	34.414	34.39	34.366	34.3419	34.3179	34.294	34.27	34.298	34.3259	34.3539	34.382	34.41		1435.72	1435.72
RDC	11.87	11.878	11.886	11.894	11.902	11.91	11.918	11.926	11.934	11.942	11.95	11.958	11.966	11.974	11.982	11.99	11.986	11.982	11.978	11.974	11.97		9756.94	9756.94
Eq. Guinea	36.95	37.0574	37.1651	37.2731	37.3814	37.49	37.6013	37.713	37.825	37.9373	38.05	38.1613	38.273	38.385	38.4973	38.61	38.594	38.578	38.562	38.546	38.53		97.5173	97.0484
Ethiopia	10.72	10.728	10.736	10.744	10.752	10.76	10.768	10.776	10.784	10.792	10.8	10.808	10.816	10.824	10.832	10.84	10.8199	10.7999	10.7799	10.7599	10.74		3108.37	3108.37
Liberia	6.6	6.598	6.596	6.594	6.592	6.59	6.59	6.59	6.59	6.59	6.59	6.588	6.586	6.584	6.582	6.58	6.584	6.58799	6.59199	6.596	6.6		936.279	924.58
Malawi	0.24	0.24	0.24	0.24	0.24	0.24	0.24	0.24	0.24	0.24	0.24	0.24	0.24	0.24	0.24	0.24	0.215474	0.193454	0.173685	0.155935	0.14		24.5028	23.3139
Nigeria	0.57	0.567986	0.565979	0.563979	0.561986	0.56	0.56	0.56	0.56	0.56	0.56	0.56	0.56	0.56	0.56	0.56	0.561986	0.563979	0.565979	0.567986	0.57		1398.8	1314.95
Sudan	0.081	0.080799	0.0805985	0.0803985	0.080199	0.08	0.079799	0.0795985	0.0793985	0.079199	0.079	0.078799	0.0785985	0.0783985	0.078199	0.078	0.078	0.078	0.078	0.078	0.078		11.7468	11.2362
Uganda	1.41	1.41199	1.41399	1.41599	1.41799	1.42	1.42	1.42	1.42	1.42	1.42	1.42	1.42	1.42	1.42	1.42	1.28449	1.16191	1.05103	0.950728	0.86		276.697	259.281
Tanzania	5.82	5.818	5.816	5.814	5.812	5.81	5.808	5.806	5.804	5.802	5.8	5.798	5.796	5.794	5.792	5.79	5.78599	5.78199	5.77799	5.77399	5.77		806.666	783.508
Average over all countries (weighted by population)						6.21715	6.21984	6.21316	6.21174	6.2198	6.23065	6.24312	6.25432	6.26558	6.27672	6.28789	6.10725	5.9476	5.8072	5.68557	5.59129		30442.8	29168.3
Source: GBD, 2010.
Disease burden of HOOKWORM infection (DALYs per 100,000)																							Crude burden in ivermectin treated individuals (DALYs)
Country	1990	1991	1992	1993	1994	1995	1991	1992	1993	1994	2000	1991	1992	1993	1994	2005	1991	1992	1993	1994	2010		1995 - 2010	2000 - 2010
Angola	66.1	66.0539	66.0079	65.9619	65.9159	65.87	65.8239	65.7779	65.7319	65.6859	65.64	65.5939	65.5479	65.5019	65.4559	65.41	65.3659	65.3219	65.2779	65.2339	65.19		1183.5	1183.5
Burundi	203.43	203.53	203.63	203.73	203.83	203.93	204.032	204.134	204.236	204.338	204.44	204.544	204.648	204.752	204.856	204.96	185.826	168.478	152.749	138.489	125.56		7453.13	7453.13
Cameroon	109.31	109.342	109.374	109.406	109.438	109.47	109.504	109.538	109.572	109.606	109.64	109.674	109.708	109.742	109.776	109.81	97.6419	86.8222	77.2015	68.6468	61.04		32308.5	31727.7
CAR	146.1	146.194	146.288	146.382	146.476	146.57	146.666	146.762	146.858	146.954	147.05	147.146	147.242	147.338	147.434	147.53	147.506	147.482	147.458	147.434	147.41		16201.4	14828.7
Chad	87.87	87.852	87.834	87.816	87.798	87.78	87.762	87.744	87.726	87.708	87.69	87.672	87.654	87.636	87.618	87.6	87.5118	87.4237	87.3357	87.2478	87.16		12102.9	11125.4
Congo	86.23	86.23	86.23	86.23	86.23	86.23	86.23	86.23	86.23	86.23	86.23	86.232	86.234	86.236	86.238	86.24	86.282	86.3239	86.3659	86.408	86.45		3608.94	3608.94
RDC	83.36	83.376	83.392	83.408	83.424	83.44	83.456	83.472	83.488	83.504	83.52	83.534	83.548	83.562	83.576	83.59	83.584	83.578	83.572	83.566	83.56		68080.4	68080.4
Eq. Guinea	75.27	75.288	75.306	75.324	75.342	75.36	75.378	75.396	75.414	75.432	75.45	75.466	75.482	75.498	75.514	75.53	75.4859	75.4419	75.3979	75.3539	75.31		191.033	190.101
Ethiopia	49.97	49.944	49.918	49.892	49.866	49.84	49.814	49.788	49.762	49.736	49.71	49.686	49.662	49.638	49.614	49.59	49.618	49.646	49.674	49.702	49.73		14305.1	14305.1
Liberia	119.88	119.916	119.952	119.988	120.024	120.06	120.096	120.132	120.168	120.204	120.24	120.276	120.312	120.348	120.384	120.42	120.372	120.324	120.276	120.228	120.18		17088.3	16874.9
Malawi	40.15	40.1079	40.0659	40.0239	39.9819	39.94	39.8979	39.8559	39.8139	39.7719	39.73	39.6899	39.6499	39.6099	39.5699	39.53	35.2155	31.3719	27.9478	24.8974	22.18		3989.86	3792.7
Nigeria	31.51	31.504	31.498	31.492	31.486	31.48	31.472	31.464	31.456	31.448	31.44	31.432	31.424	31.416	31.408	31.4	31.38	31.36	31.34	31.32	31.3		77945.3	73236.4
Sudan	36.59	36.5579	36.5259	36.4939	36.4619	36.43	36.4	36.3699	36.3399	36.31	36.28	36.2479	36.2159	36.1839	36.1519	36.12	36.0053	35.8909	35.7769	35.6633	35.55		5386.59	5152.59
Uganda	98.74	98.702	98.664	98.626	98.588	98.55	98.514	98.478	98.442	98.406	98.37	98.332	98.294	98.256	98.218	98.18	88.266	79.3531	71.3401	64.1364	57.66		19007.4	17800.4
Tanzania	118.7	118.69	118.68	118.67	118.66	118.65	118.642	118.634	118.626	118.618	118.61	118.6	118.59	118.58	118.57	118.56	118.436	118.312	118.188	118.064	117.94		16503.3	16029.9
Average over all countries (weighted by population)						63.8626	63.7899	63.719	63.75	63.8111	63.857	63.8937	63.9329	63.9823	64.0439	64.1052	62.5734	61.1847	59.9318	58.7905	57.7494		312674	299598
Source: GBD, 2010.
Disease burden LYMPHATIC FILARIASIS (DALYs per 100,000)																							Crude burden in ivermectin treated individuals (DALYs)
Country	1990	1991	1992	1993	1994	1995	1991	1992	1993	1994	2000	1991	1992	1993	1994	2005	1991	1992	1993	1994	2010		1995 - 2010	2000 - 2010
Angola	46.62	46.628	46.636	46.644	46.652	46.66	46.666	46.672	46.678	46.684	46.69	46.696	46.702	46.708	46.714	46.72	46.9458	47.1727	47.4007	47.6298	47.86		862.749	862.749
Burundi	141.51	141.773	142.037	142.301	142.565	142.83	143.097	143.364	143.632	143.901	144.17	144.437	144.705	144.973	145.241	145.51	146.681	147.861	149.051	150.251	151.46		7267.92	7267.92
Cameroon	200.58	200.502	200.424	200.346	200.268	200.19	200.114	200.038	199.962	199.886	199.81	199.732	199.654	199.576	199.498	199.42	199.398	199.376	199.354	199.332	199.31		72497.1	71437.7
CAR	31.9	31.892	31.884	31.876	31.868	31.86	31.85	31.84	31.83	31.82	31.81	31.802	31.794	31.786	31.778	31.77	31.792	31.814	31.836	31.858	31.88		3498.58	3201.34
Chad	152.1	152.004	151.908	151.812	151.716	151.62	151.522	151.424	151.326	151.228	151.13	151.034	150.938	150.842	150.746	150.65	150.716	150.782	150.848	150.914	150.98		20874.8	19189.1
Congo	123.73	123.965	124.201	124.437	124.673	124.91	125.145	125.381	125.617	125.853	126.09	126.329	126.569	126.809	127.049	127.29	127.517	127.745	127.973	128.201	128.43		5334.7	5334.7
RDC	19.7	19.6639	19.6278	19.5918	19.5559	19.52	19.4819	19.4438	19.4058	19.3679	19.33	19.2939	19.2578	19.2218	19.1859	19.15	19.162	19.174	19.186	19.198	19.21		15635.4	15635.4
Eq. Guinea	140.37	140.472	140.574	140.676	140.778	140.88	140.98	141.08	141.18	141.28	141.38	141.482	141.584	141.686	141.788	141.89	142.792	143.701	144.615	145.534	146.46		365.154	363.408
Ethiopia	3.9	3.90995	3.91992	3.92992	3.93995	3.95	3.96193	3.97389	3.98589	3.99793	4.01	4.01995	4.02993	4.03993	4.04995	4.06	4.11072	4.16207	4.21406	4.2667	4.32		1203.5	1203.5
Liberia	248.76	249.432	250.107	250.783	251.46	252.14	252.822	253.506	254.192	254.88	255.57	256.262	256.956	257.652	258.35	259.05	260.196	261.347	262.503	263.664	264.83		37104.3	36651.8
Malawi	204.35	204.518	204.686	204.854	205.022	205.19	205.36	205.53	205.7	205.87	206.04	206.21	206.38	206.55	206.72	206.89	206.78	206.67	206.56	206.45	206.34		25551.8	24532.6
Nigeria	184.51	184.416	184.322	184.228	184.134	184.04	183.944	183.848	183.752	183.656	183.56	183.466	183.372	183.278	183.184	183.09	182.448	181.807	181.169	180.534	179.9		452614	425113
Sudan	119.86	120.246	120.632	121.02	121.41	121.8	122.19	122.58	122.972	123.365	123.76	124.157	124.556	124.956	125.357	125.76	126.384	127.011	127.641	128.274	128.91		19108.2	18314.2
Uganda	173.2	172.012	170.832	169.66	168.496	167.34	166.194	165.057	163.927	162.805	161.69	160.581	159.479	158.385	157.299	156.22	153.743	151.305	148.905	146.544	144.22		34257.7	32260.9
Tanzania	94	93.7769	93.5544	93.3324	93.1109	92.89	92.671	92.4525	92.2345	92.017	91.8	91.583	91.3665	91.1505	90.935	90.72	89.6364	88.5658	87.5079	86.4627	85.43		12405	12037.5
Average over all countries (weighted by population)						113.332	113.229	113.307	113.296	113.116	112.909	112.684	112.439	112.166	111.885	111.624	111.09	110.556	110.038	109.508	109.043		564060	540870
Source: GBD, 2010.
Disease burden STRONGYLOIDIASIS (DALYs per 100,000)																							Crude burden in ivermectin treated individuals (DALYs)
Country	1990	1991	1992	1993	1994	1995	1991	1992	1993	1994	2000	1991	1992	1993	1994	2005	1991	1992	1993	1994	2010		1995 - 2010	2000 - 2010
Angola	17.924	17.9156	17.9072	17.8988	17.8904	17.882	17.8835	17.8851	17.8867	17.8883	17.89	17.8736	17.8571	17.8407	17.8244	17.808	17.8276	17.8474	17.8674	17.8876	17.908		324.355	324.355
Burundi	46.27	46.24	46.2106	46.1819	46.1536	46.126	46.1101	46.0946	46.0794	46.0645	46.05	46.0676	46.0852	46.1028	46.1204	46.138	41.8257	37.9165	34.3728	31.1602	28.248		1677.19	1677.19
Cameroon	58.65	58.5699	58.4901	58.4105	58.3311	58.252	58.2042	58.1565	58.1089	58.0614	58.014	57.9803	57.9466	57.913	57.8795	57.846	51.4679	45.7936	40.7453	36.2539	32.258		17049.1	16741.4
CAR	31.802	31.8078	31.8137	31.8197	31.8258	31.832	31.8403	31.8486	31.857	31.8655	31.874	31.1755	30.7232	30.4327	30.2485	30.134	30.2621	30.4596	30.7627	31.2263	31.934		3408.16	3110.48
Chad	17.7166	17.7126	17.7086	17.7046	17.7006	17.6966	17.6946	17.6926	17.6906	17.6886	17.6866	17.6822	17.6778	17.6734	17.669	17.6646	17.6515	17.6385	17.6257	17.6131	17.6006		2441.74	2244.61
Congo	36.75	36.7552	36.7604	36.7656	36.7708	36.776	36.7999	36.8238	36.8478	36.8719	36.896	36.9103	36.9247	36.9391	36.9535	36.968	36.9764	36.9848	36.9932	37.0016	37.01		1545.86	1545.86
RDC	26.694	26.6775	26.661	26.6446	26.6283	26.612	26.6292	26.6463	26.6635	26.6808	26.698	26.7136	26.7291	26.7447	26.7604	26.776	26.8535	26.9319	27.0111	27.0911	27.172		21989.5	21989.5
Eq. Guinea	41.578	41.6167	41.6554	41.6942	41.7331	41.772	41.9308	42.0906	42.2514	42.4132	42.576	42.5959	42.6158	42.6358	42.6559	42.676	42.625	42.5742	42.5234	42.4726	42.422		107.75	107.225
Ethiopia	15.51	15.4849	15.46	15.4352	15.4105	15.386	15.3808	15.3756	15.3704	15.3652	15.36	15.3652	15.3703	15.3755	15.3807	15.386	15.3636	15.3415	15.3195	15.2976	15.276		4416.65	4416.65
Liberia	28.194	28.1567	28.12	28.084	28.0487	28.014	27.9897	27.9657	27.9421	27.9189	27.896	27.9052	27.9144	27.9236	27.9328	27.942	27.9924	28.0441	28.0973	28.1519	28.208		3985.57	3936.01
Malawi	9.038	9.02227	9.00661	8.99101	8.97547	8.96	8.96176	8.96363	8.96563	8.96775	8.97	8.93313	8.89712	8.86194	8.82758	8.794	7.86622	7.0374	6.29692	5.63527	5.044		895.791	851.376
Nigeria	17.31	17.302	17.294	17.286	17.278	17.27	17.2257	17.1815	17.1375	17.0937	17.05	17.0211	16.9922	16.9634	16.9347	16.906	16.9893	17.0734	17.1582	17.2437	17.33		42425.3	39864.7
Sudan	7.5002	7.4957	7.49123	7.48679	7.48238	7.478	7.46863	7.45932	7.45008	7.44091	7.4318	7.42454	7.41729	7.41005	7.40282	7.3956	7.3706	7.3457	7.3209	7.2962	7.2716		1102.42	1054.46
Uganda	21.174	21.1664	21.1588	21.1512	21.1436	21.136	21.1339	21.1319	21.1299	21.1279	21.126	21.1224	21.1188	21.1152	21.1116	21.108	18.9813	17.0688	15.3491	13.8026	12.412		4086.18	3827.05
Tanzania	25.448	25.442	25.4359	25.4299	25.424	25.418	25.4086	25.3993	25.3901	25.381	25.372	25.3735	25.3751	25.3767	25.3783	25.38	25.3694	25.3593	25.3497	25.3406	25.332		3536.71	3435.4
Average over all countries (weighted by population)						20.596	20.5658	20.5293	20.5083	20.498	20.4858	20.473	20.4627	20.456	20.4517	20.4457	19.9931	19.5874	19.2263	18.9066	18.6339		100240	96038.6
Disease burden of SCABIES (DALYs per 100,000)																							Crude burden in ivermectin treated individuals (DALYs)
Country	1990	1991	1992	1993	1994	1995	1991	1992	1993	1994	2000	1991	1992	1993	1994	2005	1991	1992	1993	1994	2010		1995 - 2010	2000 - 2010
Angola	52.7	51.1719	49.6881	48.2474	46.8484	45.49	44.246	43.002	41.758	40.514	39.27	38.1319	37.0268	35.9537	34.9118	33.9	31.5153	29.2983	27.2373	25.3212	23.54		471.582	471.582
Burundi	92.37	88.4751	84.7444	81.1711	77.7484	74.47	71.584	68.698	65.812	62.926	60.04	57.5095	55.0856	52.764	50.5401	48.41	48.6809	48.9534	49.2274	49.5029	49.78		2399.73	2399.73
Cameroon	66.67	64.8894	63.1563	61.4696	59.8279	58.23	56.754	55.278	53.802	52.326	50.85	49.4913	48.1689	46.8819	45.6292	44.41	43.9235	43.4422	42.9663	42.4956	42.03		16092.9	15815.6
CAR	65.7	62.9158	60.2496	57.6964	55.2514	52.91	50.85	48.79	46.73	44.67	42.61	40.8055	39.0774	37.4225	35.8377	34.32	33.6482	32.9896	32.3438	31.7107	31.09		3985.09	3567.8
Chad	70.44	71.2415	72.0522	72.8721	73.7013	74.54	75.408	76.276	77.144	78.012	78.88	79.7773	80.6849	81.6028	82.5311	83.47	84.1663	84.8684	85.5763	86.2902	87.01		11518.2	10653.4
Congo	75.9	72.8365	69.8966	67.0754	64.3681	61.77	59.47	57.17	54.87	52.57	50.27	48.2406	46.2932	44.4244	42.631	40.91	39.8727	38.8617	37.8764	36.916	35.98		1671.78	1671.78
RDC	58.95	57.0402	55.1923	53.4042	51.6741	50	48.48	46.96	45.44	43.92	42.4	41.0258	39.6961	38.4095	37.1646	35.96	35.2224	34.4998	33.7921	33.099	32.42		27919.1	27919.1
Eq. Guinea	35.27	32.5135	29.9725	27.63	25.4706	23.48	21.908	20.336	18.764	17.192	15.62	14.3996	13.2746	12.2375	11.2814	10.4	10.1481	9.90228	9.66242	9.42838	9.2		26.4512	26.2387
Ethiopia	65.72	65.1191	64.5237	63.9338	63.3492	62.77	62.206	61.642	61.078	60.514	59.95	59.4021	58.8592	58.3212	57.7882	57.26	56.3111	55.3779	54.4601	53.5576	52.67		15908.5	15908.5
Liberia	30.7	31.3315	31.976	32.6337	33.3049	33.99	34.716	35.442	36.168	36.894	37.62	38.3935	39.183	39.9886	40.8109	41.65	41.3188	40.9902	40.6642	40.3408	40.02		5729.17	5663.68
Malawi	92.52	91.9654	91.4141	90.8661	90.3214	89.78	89.248	88.716	88.184	87.652	87.12	86.5957	86.0746	85.5566	85.0418	84.53	84.566	84.602	84.638	84.674	84.71		10515.2	10079.1
Nigeria	37.08	36.3887	35.7103	35.0445	34.3912	33.75	33.146	32.542	31.938	31.334	30.73	30.1592	29.599	29.0492	28.5096	27.98	26.3383	24.793	23.3383	21.969	20.68		65486.7	60778.8
Sudan	74.76	74.5589	74.3584	74.1584	73.9589	73.76	73.564	73.368	73.172	72.976	72.78	72.585	72.3904	72.1964	72.003	71.81	72.3401	72.8741	73.4121	73.9541	74.5		11031.8	10561.2
Uganda	98.56	92.9079	87.5798	82.5574	77.8229	73.36	69.608	65.856	62.104	58.352	54.6	51.4689	48.5173	45.7351	43.1123	40.64	34.9071	29.9829	25.7533	22.1204	19		8330.94	7615.26
Tanzania	80.53	78.8928	77.2888	75.7175	74.1781	72.67	71.252	69.834	68.416	66.998	65.58	64.2469	62.9409	61.6614	60.408	59.18	64.0935	69.4149	75.1782	81.42	88.18		9814.02	9545.24
Average over all countries (weighted by population)						54.5974	53.5784	52.5706	51.5785	50.5836	49.5905	48.693	47.8226	46.9774	46.1567	45.3641	44.6491	44.0583	43.5798	43.2112	42.9452		229703	219297
Source: GBD, 2010.
Population size (thousands) - not used in main calculations, only used to calculate crude totals over all countries (ignoring variation in burden and treatments between countries)
Country	1990	1991	1992	1993	1994	1995	1991	1992	1993	1994	2000	1991	1992	1993	1994	2005	1991	1992	1993	1994	2010		1995 - 2010	2000 - 2010
Angola						9419	9651	9856	10039	10215	10377	10538	10761	11057	11391	11707	11993	12264	12531	12799	13068		177666	128486
Burundi						6165	6204	6244	6417	6631	6823	7043	7287	7553	7859	8162	8465	8783	9139	9511	9863		122149	90488
Cameroon						13603	13945	14290	14638	14989	15343	15707	16094	16489	16873	17261	17658	18060	18468	18879	19711		262008	190543
CAR						3544	3622	3707	3798	3889	3980	4054	4128	4215	4289	4363	4449	4544	4641	4742	4845		66810	48250
Chad						6770	7051	7262	7479	7709	7943	8179	8436	8746	9098	9401	9649	9886	10111	10329	10543		138592	102321
Congo (Congo-Brazzaville)						2650	2731	2802	2880	2972	3104	3240	3330	3414	3504	3604	3704	3802	3905	4013	4126		53781	39746
DRC (Congo-Kinshasa)						46705	47685	48289	49349	50890	52445	54058	55702	57303	58943	60698	62522	64355	66187	68016	69851		912998	670080
Eq. Guinea						426	438	451	464	478	491	506	521	536	551	567	583	600	616	633	651		8512	6255
Ethiopia						55550	57193	58805	60484	62279	64165	66123	68187	70366	72637	74980	77411	79936	82545	85237	88013		1123911	829600
Liberia						1900	1932	2097	2350	2495	2601	2680	2753	2770	2796	2930	3108	3270	3440	3583	3685		44390	33616
Malawi						10264	10527	10839	11155	11477	11802	12129	12460	12797	13140	13492	13856	14233	14624	15029	15448		203272	149010
Nigeria						109465	112149	114862	117600	120369	123179	126014	128864	131728	134605	137495	140398	143312	146255	149229	152217		2087741	1513296
Sudan						29953	30630	31416	32362	33224	34109	35024	35927	36708	37442	38363	39396	40526	41681	42811	43940		583512	425927
Uganda						20690	21249	21861	22502	23228	23956	24690	25470	26322	27234	28199	29207	30263	31368	32370	33399		422008	312478
United Republic of Tanzania						29753	30392	31093	31951	32808	33712	34567	35383	36199	36990	37771	38569	39384	40213	41049	41893		571727	415730
Source:http://www.census.gov/ipc/www/idb/country.php

## Sheet: Table 2 - burden averted
Table 2.
	Counterfactual burden (DALYs x 1,000) in people treated with ivermectin a								Burden averted (DALYs x 1,000) by ivermectin mass treatment
Country	Ascariasis	Trichuriasis	Hookworm	Lymphatic filariasis	Strongyloidiasis	EPSDs	Total		Ascariasis	Trichuriasis	Hookworm	Lymphatic filariasis	Strongyloidiasis	EPSDs	Total	(%)
Angola	0.369256	0.123805	1.03556	0.862749	0.324355	0.471582	3.18731	(0.2%)	0.184628	0.0619026	0.207113	0.0862749	0.162178	0.235791	0.937887	(0.2%)
Burundi	0.792089	0.257325	6.52149	7.26792	1.67719	2.39973	18.9157	(1.1%)	0.396045	0.128663	1.3043	0.726792	0.838594	1.19987	4.59426	(0.9%)
Cameroon	47.2848	12.2692	28.27	72.4971	17.0491	16.0929	193.463	(11.2%)	23.6424	6.13461	5.65399	7.24971	8.52454	8.04644	59.2517	(12%)
Central African Republic	1.07176	0.344603	21.2644	3.49858	5.11223	5.97764	37.2692	(2.1%)	0.535879	0.172301	4.25288	0.349858	2.55612	2.98882	10.8559	(2.2%)
Chad	0.177839	0.000739022	15.885	20.8748	3.66261	17.2773	57.8783	(3.3%)	0.0889196	0.000369511	3.177	2.08748	1.8313	8.63865	15.8237	(3.2%)
Congo	3.02021	1.61519	3.15783	5.3347	1.54586	1.67178	16.3456	(0.9%)	1.5101	0.807593	0.631565	0.53347	0.772929	0.835889	5.09155	(1%)
Democratic Republic of Congo	36.1241	10.9766	59.5704	15.6354	21.9895	27.9191	172.215	(9.9%)	18.062	5.48828	11.9141	1.56354	10.9948	13.9595	61.9822	(12.6%)
Equatorial Guinea	0.281472	0.109707	0.167154	0.365154	0.10775	0.0264512	1.05769	(0.1%)	0.140736	0.0548535	0.0334308	0.0365154	0.0538748	0.0132256	0.332636	(0.1%)
Ethiopia	5.25352	3.49692	12.5169	1.2035	4.41665	15.9085	42.796	(2.5%)	2.62676	1.74846	2.50339	0.12035	2.20832	7.95424	17.1615	(3.5%)
Liberia c	2.14116	1.05331	14.9523	37.1043	3.98557	5.72917	64.9658	(3.7%)	1.07058	0.526657	2.99046	3.71043	1.99279	2.86459	13.1555	(2.7%)
Malawi	0.52267	0.0275656	3.49113	25.5518	0.895791	10.5152	41.0041	(2.4%)	0.261335	0.0137828	0.698225	2.55518	0.447896	5.25759	9.23401	(1.9%)
Nigeria	224.07	2.36048	102.303	452.614	63.6379	98.2301	943.215	(54.4%)	112.035	1.18024	20.4606	45.2614	31.819	49.115	259.871	(52.8%)
Sudan	0.127964	0.0132152	4.71327	19.1082	1.10242	11.0318	36.0968	(2.1%)	0.063982	0.0066076	0.942653	1.91082	0.551208	5.5159	8.99116	(1.8%)
Uganda	1.29021	0.311284	16.6314	34.2577	4.08618	8.33094	64.9078	(3.7%)	0.645106	0.155642	3.32629	3.42577	2.04309	4.16547	13.7614	(2.8%)
United Republic of Tanzania	0.420224	0.9075	14.4404	12.405	3.53671	9.81402	41.5238	(2.4%)	0.210112	0.45375	2.88808	1.2405	1.76835	4.90701	11.4678	(2.3%)
Total	322.947	33.8674	304.92	708.58	133.13	231.396	1734.84	(100%)	161.474	16.9337	60.9841	70.858	66.5649	115.698	492.512	(100%)

## Sheet: Comparison to impact on oncho
Table X.
Disease	Estimated total DALYs ('000) averted by APOC through to 2010	Percent relative to onchocerciasis (%)
Onchocerciasis: total	8929
Ascariasis	161.474	1.80842
Trichuriasis	16.9337	0.189648
Hookworm disease	60.9841	0.682989
Lymphatic filariasis (LF)	70.858	0.793572
Strongyloidiasis	66.5649	0.745491
Epidermal parasitic skin diseases (EPSDs)	115.698	1.29576
Total burden averted from off-target infections	492.512	5.51587

## Sheet: Figure 1 - sensitivity analysis
Figure 1. Sensitivity analysis						For plotting
Variable or assumption	Lower estimate (DALYs)	Higher estimate (DALYs)	Lower estimate (%) relative to averted burden from onchocerciasis	Higher estimate (%) relative to averted burden from onchocerciasis		Lower bound	Difference between lower bound and main estimate	Difference between main estimate and upper bound
Parameter β for ascariasis (±20%)	460218	524807	-6.55714	6.55714		460.218	32.2947	32.2947
Parameter β for trichuriasis (±20%)	489126	495899	-0.687646	0.687646		489.126	3.38674	3.38674
Parameter β for hookworm (±20%)	480316	504709	-2.47645	2.47645		480.316	12.1968	12.1968
Parameter β for LF (±20%)	478341	506684	-2.87741	2.87741		478.341	14.1716	14.1716
Parameter β for strongyloidiasis (±20%)	479199	505825	-2.70308	2.70308		479.199	13.313	13.313
Parameter β for EPSDs (±20%)	469373	515652	-4.69828	4.69828		469.373	23.1396	23.1396
Assumed proportion of strongyloidiasis burden (1/5): halfed or doubled	459230	559077	-6.75769	13.5154		459.23	33.2825	66.5649
h (±20%) in countries where clustering was assumed	435202	549823	-11.6363	11.6363		435.202	57.3102	57.3102
No clustering (h = 1 for all countries) vs clustering in all countries (h = 1.5)	412895	583914	-16.1656	18.5581		412.895	79.6174	91.4011
All β Parameters (±20%)	394010	591015	-20	20		394.01	98.5025	98.5025
